# Supplementary material
Source: Research Square preprint supplement (doi:10.21203/rs.3.rs-8457236/v1)

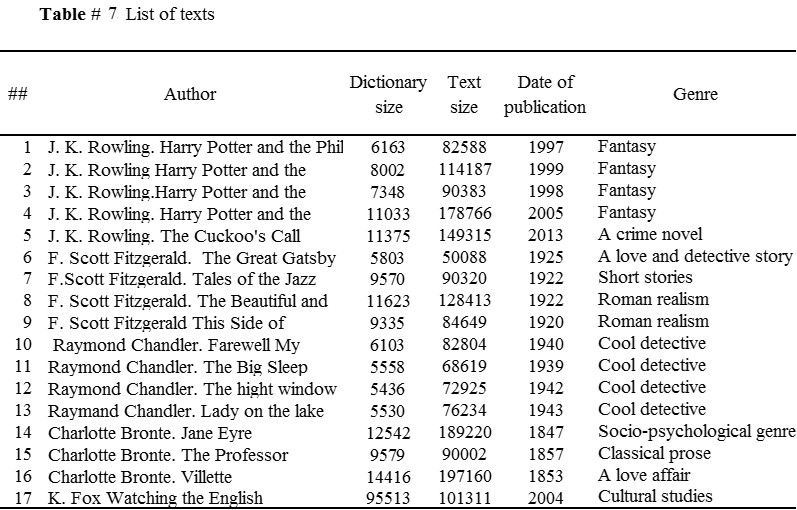

Supplement: Supplementary file 1 [file 5e9df36175acb712a17ea6c2.docx]
